# Supplementary material for: Myelin pathology in ataxia-telangiectasia is the cell autonomous effect of ATM deficiency in oligodendrocytes
Source: bioRxiv or medRxiv preprint supplement (doi:10.1101/2021.01.22.20245217), 2023-11-13
Supplement: Supplementary file [file media-1.pdf]

| Antibody            | Host & Clonality   | Target                                                                         | Application & dilution                  | Manufacturer   | Cat No. (Clone)     |
|---------------------|--------------------|--------------------------------------------------------------------------------|-----------------------------------------|----------------|---------------------|
| 53BP1               | Rabbit Polyclonal  | Marker of double strand breaks (DSB) damage in the nucleus                     | ICC: 1:250                              | Abcam          | ab36823 (N/A)       |
| 8-OHdG              | Goat polyclonal    | Marker of oxidative DNA lesion in the nucleus                                  | IHC: 1:250                              | EMD Millipore  | AB5830 (N/A)        |
| APC                 | Mouse monoclonal   | Mature OL marker (commonly known as CC1)                                       | IHC: 1:500                              | Millipore      | MABC200 (CC1)       |
| ATM                 | Mouse monoclonal   | Ataxia telangiectasia mutated DSB repair protein                               | IHC: 1:500<br>ICC: 1:250                | Abcam          | ab78 (2C1)          |
| Cleaved Caspase 3   | Mouse monoclonal   | Apoptotic cells                                                                | IHC: 1:250                              | EMD Millipore  | MAB10753 (3D9.3)    |
| Cux2                | Rabbit polyclonal  | Marker for cortical neurons layer II-III                                       | WB 1:1000                               | Abcam          | ab130395            |
| Cyclin A2           | Rabbit Monoclonal  | Marker of G1/S transition                                                      | ICC: 1:250                              | Abcam          | ab181591 (EPR17351) |
| Cyclin D1           | Mouse monoclonal   | A marker for G1/S phase transition during cell cycle                           | IHC: 1:250<br>ICC: 1:250                | Santa Cruz     | sc-450 (72-13G)     |
| Cyclin D1           | Rabbit polyclonal  | A marker for G1 entry during cell cycle                                        | IHC: 1:250                              | Abcam          | ab16663 (SP4)       |
| GAPDH               | Mouse monoclonal   | Loading control for WB                                                         | WB: 1:10000                             | Abcam          | ab8245 (6C5)        |
| GFAP                | Rabbit polyclonal  | Activated astrocytes                                                           | IHC: 1:500                              | Abcam          | ab7260 (N/A)        |
| MAG                 | Mouse monoclonal   | Myelin associated glycoprotein                                                 | WB: 1:1000                              | Millipore      | MAB1567 (N/A)       |
| MAP2                | Chicken polyclonal | Neuronal/dendritic marker                                                      | IHC: 1:2000                             | Abcam          | ab5392 (N/A)        |
| MAP2                | Mouse monoclonal   | Neuronal/dendritic marker                                                      | WB: 1:5000                              | Abcam          | ab118853 (MT-07)    |
| MBP                 | Mouse monoclonal   | Myelin basic protein; Myelin; Myelinating OL                                   | IHC: 1:1000<br>ICC: 1:500<br>WB: 1:2000 | Covance        | SMI-99P (N/A)       |
| MOG                 | Mouse monoclonal   | Myelin Oligodendrocyte Glycoprotein                                            | WB 1:1000<br>ICC 1:500                  | Millipore      | MAB5680 (N/A)       |
| MyRF                | Rabbit polyclonal  | Perinuclear region and nucleus of postmitotic and myelinating OL               | IHC: 1:250                              | EMD Millipore  | ABN45 (N/A)         |
| NeuN                | Mouse monoclonal   | Pan-neuronal nuclei marker                                                     | WB 1:1000                               | Millipore      | MAB377 (A60)        |
| NG2 (CSPG4)         | Rabbit polyclonal  | Marker of OL progenitor cells                                                  | WB: 1:500                               | EMD Millipore  | AB5320 (N/A)        |
| Olig2               | Mouse monoclonal   | Pan-OL-specific nuclear transcription factor                                   | IHC: 1:250<br>WB: 1:500                 | EMD Millipore  | MABN50 (211F1.1)    |
| pATM                | Rabbit polyclonal  | Ataxia telangiectasia mutated DSB repair protein phosphorylated at serine 1981 | ICC: 1:250                              | Abcam          | ab81292 (EP1890Y)   |
| $\gamma$ H2A.X      | Rabbit polyclonal  | Marker of double strand breaks (DSB) Phosphorylated at serine 139              | IHC: 1:250<br>ICC: 1:250                | Abcam          | ab2893 (N/A)        |
| PLP                 | Rabbit polyclonal  | Myelin proteolipid protein                                                     | WB 1:1000                               | Thermofisher   | PA3-150 (N/A)       |
| pS/TQ               | Rabbit polyclonal  | Phospho-(Ser/Thr) ATM/ATR Substrate                                            | WB 1:1000                               | Cell Signaling | 2851S (N/A)         |
| ROR $\alpha$        | Rabbit polyclonal  | Marker for purkinje cells in cerebellum                                        | WB 1:1000                               | Abcam          | ab60134 (N/A)       |
| Synapsin I          | Rabbit polyclonal  | Pre-synaptic marker                                                            | WB 1:1000                               | Abcam          | ab64581 (N/A)       |
| Tubulin $\beta$ III | Mouse monoclonal   | Neuron specific microtubule in axon                                            | WB 1:1000                               | BioLegend      | MMS-435P (N/A)      |
