# Supplementary material for: Myelin pathology in ataxia-telangiectasia is the cell autonomous effect of ATM deficiency in oligodendrocytes
Source: bioRxiv or medRxiv preprint supplement (doi:10.1101/2021.01.22.20245217), 2023-11-13
Supplement: Supplementary file [file media-2.pdf]

| Case    | Age Range | Brain weight (g) | Sex | Group                 | PMI (hours) | ATM Variant (HGVS)                                                         | ATM Variant (HGVS)                                              | InDels                | Mutation type                                             | ATM domain affected |
|---------|-----------|------------------|-----|-----------------------|-------------|----------------------------------------------------------------------------|-----------------------------------------------------------------|-----------------------|-----------------------------------------------------------|---------------------|
| AT1     | 25-30     | 1410             | F   | Ataxia Telangiectasia | 4           | NM_000051.3:c.3712_3716delTTATT                                            | NP_000042.3:p.Leu1238LysfsTer6                                  | deletion              | frameshift_variant                                        | N-terminal          |
| AT2     | 30-35     | 1565             | M   | Ataxia Telangiectasia | 13          | NM_000051.3:c.7875T>G                                                      | NP_000042.3:p.Asp2625Glu                                        | snv                   | missense_variant                                          | FAT/Kinase          |
| AT3     | 15-20     | 1153             | F   | Ataxia Telangiectasia | 2           | NM_000051.3:c.2284_2285delCT                                               | NP_000042.3:p.Leu762ValfsTer2                                   | deletion              | frameshift_variant                                        | N-terminal          |
| AT4     | 20-25     | 980              | F   | Ataxia Telangiectasia | 2           | NM_000051.3:c.8880G>A                                                      | NP_000042.3:p.Trp2960Ter                                        | snv                   | stop_gained                                               | Kinase              |
| AT5     | 15-20     | 1400             | M   | Ataxia Telangiectasia | 15          | NM_000051.3:c.944delT<br>NM_000051.3:c.1564_1565delGA                      | NP_000042.3:p.Leu315TyrfsTer5<br>NP_000042.3:p.Glu522IlefsTer43 | deletion              | frameshift_variant                                        | N-terminal          |
| AT6     | 25-30     | 1380             | M   | Ataxia Telangiectasia | 7           | NM_000051.3:c.3085dupA<br>NM_000051.3:c.7327C>T                            | NP_000042.3:p.Thr1029AsnfsTer19<br>NP_000042.3:p.Arg2443Ter     | insertion<br>snv      | frameshift_variant<br>stop_gained                         | N-terminal<br>FAT   |
| AT7     | 25-30     | N.D.             | F   | Ataxia Telangiectasia | 3           | NM_000051.3:c.6404_6405insTT                                               | NP_000042.3:p.Arg2136Ter                                        | insertion             | frameshift_variant                                        | FAT                 |
| AT8     | 20-25     | 1370             | M   | Ataxia Telangiectasia | 15          | NM_000051.3:c.1290_1291delTG                                               | NP_000042.3:p.Cys430Ter                                         | deletion              | frameshift_variant                                        | N-terminal          |
| AT9     | 25-30     | 1572             | M   | Ataxia Telangiectasia | 14          | NM_000051.3:c.6404_6405insTT<br>NM_000051.3:c.8036_8051delATCTGGTGACTATACA | NP_000042.3:p.Arg2136Ter<br>NP_000042.3:p.Asn2679SerfsTer9      | insertion<br>deletion | frameshift_variant<br>frameshift_variant                  | FAT<br>FAT/Kinase   |
| AT10    | 35-40     | 1180             | M   | Ataxia Telangiectasia | 20          | NM_000051.3:c.742C>T<br>NM_000051.3:c.6095G>A                              | NP_000042.3:p.Arg248Ter<br>NP_000042.3:p.Arg2032Lys             | snv<br>snv            | stop_gained<br>missense_variant,<br>splice_region_variant | N-terminal<br>FAT   |
| NC1     | 10-20     | 1600             | M   | Control               | 33          |                                                                            |                                                                 |                       |                                                           |                     |
| NC2     | 10-20     | 1660             | M   | Control               | 18          |                                                                            |                                                                 |                       |                                                           |                     |
| NC3     | 20-25     | N.D.             | M   | Control               | 14          |                                                                            |                                                                 |                       |                                                           |                     |
| NC4     | 30-35     | 1550             | M   | Control               | 16          |                                                                            |                                                                 |                       |                                                           |                     |
| NC5     | 20-25     | 1160             | F   | Control               | 14          |                                                                            |                                                                 |                       |                                                           |                     |
| NC6     | 30-35     | 1800             | M   | Control               | 27          |                                                                            | Not applicable                                                  |                       |                                                           |                     |
| NC7     | 15-20     | 1400             | F   | Control               | 5           |                                                                            |                                                                 |                       |                                                           |                     |
| NC8     | 25-30     | 1240             | F   | Control               | 11          |                                                                            |                                                                 |                       |                                                           |                     |
| NC9     | 25-30     | 1530             | M   | Control               | 12          |                                                                            |                                                                 |                       |                                                           |                     |
| NC10    | 15-20     | 1350             | F   | Control               | 16          |                                                                            |                                                                 |                       |                                                           |                     |
| NC-Age1 | 80-85     | N.D.             | M   | Ageing-Control        | 5           |                                                                            |                                                                 |                       |                                                           |                     |
| NC-Age2 | 70-75     | N.D.             | M   | Ageing-Control        | 3           |                                                                            |                                                                 |                       |                                                           |                     |
| NC-Age3 | 85-90     | N.D.             | M   | Ageing-Control        | 7           |                                                                            |                                                                 |                       |                                                           |                     |
| NC-Age4 | 60-65     | N.D.             | m   | Ageing-Control        | 6.5         |                                                                            |                                                                 |                       |                                                           |                     |
| NC-Age5 | 75-80     | N.D.             | M   | Ageing-Control        | 6           |                                                                            | Not applicable                                                  |                       |                                                           |                     |
| NC-Age6 | 75-80     | N.D.             | F   | Ageing-Control        | 10.5        |                                                                            |                                                                 |                       |                                                           |                     |
| NC-Age7 | 70-75     | N.D.             | F   | Ageing-Control        | 4.5         |                                                                            |                                                                 |                       |                                                           |                     |
| NC-Age8 | 85-90     | N.D.             | M   | Ageing-Control        | 4           |                                                                            |                                                                 |                       |                                                           |                     |
| NC-Age9 | 75-80     | N.D.             | M   | Ageing-Control        | 14          |                                                                            |                                                                 |                       |                                                           |                     |
